# Supplementary material for: DFT Calculations and Molecular Docking Studies on a Chromene Derivative
Source: Hindawi journal article supplement (doi:10.1155/2021/6674261), 2021-04-01
Supplement: f1 [file 6674261.f1.docx]

DFT calculations and molecular docking studies on a Chromene derivative

Najet Aouled Dlala1, Younes BOUAZIZI2, Houcine Ghalla1 and Naceur HAMDI3

*1Quantum and Statistical Physics Laboratory, Faculty of Sciences, University of Monastir, Monastir, Tunisia*

*2 Heterocyclic Chemistry, Natural Products and Reactivity (LR11ES39) Laboratory, Faculty of Sciences, University of Monastir, Monastir, Tunisia*

*3Department of Chemistry, College of Science and Arts, Qassim University, Ar Rass, Saudi Arabia*

aCorresponding author E- mail: naceur.hamdi@isste.rnu.tn (Pr. Naceur Hamdi)

**Table S1**

Mulliken charge distribution of Chrom-D calculated at B3LYP/6-311++G(d,p) level of theory.

| Atom | Charge | Atom | Charge |
| --- | --- | --- | --- |
| O1 | -0.105 | C19 | 0.886 |
| C2 | -0.080 | C20 | 0.517 |
| C3 | 1.776 | N21 | -0.354 |
| C4 | -0.510 | H22 | 0.332 |
| H5 | 0.328 | H23 | 0.304 |
| C6 | 0.144 | C24 | -1.379 |
| C7 | 0.198 | N25 | -0.297 |
| O8 | -0.365 | C26 | 0.905 |
| O9 | -0.135 | C27 | -0.040 |
| C10 | -0.385 | H28 | 0.193 |
| C11 | -0.602 | C29 | -0.547 |
| H12 | 0.223 | H30 | 0.204 |
| C13 | -0.292 | C31 | -0.353 |
| H14 | 0.205 | H32 | 0.181 |
| C15 | -0.350 | C33 | -0.424 |
| H16 | 0.213 | H34 | 0.206 |
| C17 | -0.463 | C35 | -0.522 |
| H18 | 0.178 | H36 | 0.209 |

**Table S2**

Condensed Fukui functions (fj-,fj+, fj°, in e), condensed dual descriptors (Δ(r), in e)) calculated based on NBO charge distribution at the same level of theory.

| Atom | qj(N)a | qj(N+1) | qj(N-1) | fj- | fj+ | fj° | Δf(r) |
| --- | --- | --- | --- | --- | --- | --- | --- |
| O1 | -0.50039 | -0.52296 | -0.26657 | -0.02257 | 0.25639 | 0.11691 | 0.27896 |
| C2 | 0.60844 | 0.57459 | 0.30895 | -0.03385 | -0.26564 | -0.149745 | -0.23179 |
| C3 | -0.15261 | -0.30527 | -0.15796 | -0.15266 | 0.14731 | -0.002675 | 0.29997 |
| C4 | -0.27404 | -0.25575 | -0.12513 | 0.01829 | 0.13062 | 0.074455 | 0.11233 |
| H5 | 0.26438 | 0.24288 | 0.11415 | -0.0215 | -0.12873 | -0.075115 | -0.10723 |
| C6 | -0.07127 | -0.06377 | -0.01264 | 0.0075 | 0.05113 | 0.029315 | 0.04363 |
| C7 | 0.74025 | 0.74317 | 0.38586 | 0.00292 | -0.35731 | -0.177195 | -0.36023 |
| O8 | -0.52542 | -0.56126 | -0.29628 | -0.03584 | 0.26498 | 0.11457 | 0.30082 |
| O9 | -0.48123 | -0.50542 | -0.25324 | -0.02419 | 0.25218 | 0.113995 | 0.27637 |
| C10 | 0.34713 | 0.32619 | 0.1798 | -0.02094 | -0.14639 | -0.083665 | -0.12545 |
| C11 | -0.23229 | -0.23967 | -0.13437 | -0.00738 | 0.1053 | 0.04896 | 0.11268 |
| H12 | 0.24545 | 0.22968 | 0.10201 | -0.01577 | -0.12767 | -0.07172 | -0.1119 |
| C13 | -0.11524 | -0.15653 | -0.04465 | -0.04129 | 0.11188 | 0.035295 | 0.15317 |
| H14 | 0.22741 | 0.21038 | 0.08893 | -0.01703 | -0.12145 | -0.06924 | -0.10442 |
| C15 | -0.17034 | -0.20449 | -0.13676 | -0.03415 | 0.06773 | 0.01679 | 0.10188 |
| H16 | 0.22568 | 0.2097 | 0.09218 | -0.01598 | -0.11752 | -0.06675 | -0.10154 |
| C17 | -0.18 | -0.18038 | -0.05379 | -0.00038 | 0.12659 | 0.063105 | 0.12697 |
| H18 | 0.22212 | 0.2174 | 0.09484 | -0.00472 | -0.12256 | -0.06364 | -0.11784 |
| C19 | -0.0526 | -0.06782 | -0.03855 | -0.01522 | 0.02927 | 0.007025 | 0.04449 |
| C20 | 0.31394 | 0.31479 | 0.21325 | 0.00085 | -0.10154 | -0.050345 | -0.10239 |
| N21 | -0.67458 | -0.77637 | -0.39314 | -0.10179 | 0.38323 | 0.14072 | 0.48502 |
| H22 | 0.427 | 0.41188 | 0.19892 | -0.01512 | -0.21296 | -0.11404 | -0.19784 |
| H23 | 0.42309 | 0.39781 | 0.19409 | -0.02528 | -0.20372 | -0.1145 | -0.17844 |
| C24 | 0.23365 | 0.27457 | 0.147 | 0.04092 | -0.12757 | -0.043325 | -0.16849 |
| N25 | -0.20074 | -0.34047 | -0.19925 | -0.13973 | 0.14122 | 0.000745 | 0.28095 |
| C26 | 0.02105 | -0.02927 | 0.00044 | -0.05032 | 0.02971 | -0.010305 | 0.08003 |
| C27 | -0.18022 | -0.18108 | -0.08709 | -0.00086 | 0.09399 | 0.046565 | 0.09485 |
| H28 | 0.22718 | 0.20947 | 0.10081 | -0.01771 | -0.10866 | -0.063185 | -0.09095 |
| C29 | -0.1402 | -0.18905 | -0.10418 | -0.04885 | 0.08487 | 0.01801 | 0.13372 |
| H30 | 0.22927 | 0.20673 | 0.09566 | -0.02254 | -0.11107 | -0.066805 | -0.08853 |
| C31 | -0.10984 | -0.19916 | -0.10599 | -0.08932 | 0.09317 | 0.001925 | 0.18249 |
| H32 | 0.22662 | 0.20514 | 0.09428 | -0.02148 | -0.11086 | -0.06617 | -0.08938 |
| C33 | -0.19288 | -0.19472 | -0.10319 | -0.00184 | 0.09153 | 0.044845 | 0.09337 |
| H34 | 0.22661 | 0.2037 | 0.09531 | -0.02291 | -0.10839 | -0.06565 | -0.08548 |
| C35 | -0.16263 | -0.20189 | -0.09543 | -0.03926 | 0.10646 | 0.0336 | 0.14572 |
| H36 | 0.20993 | 0.19981 | 0.10298 | -0.01012 | -0.09683 | -0.053475 | -0.08671 |

aq(N-1), q(N) and q(N+1) are the atomic NBO charge at each atom.

| **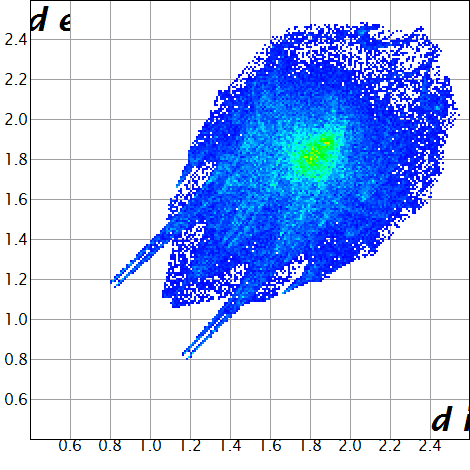**  **Total (100 %)** | **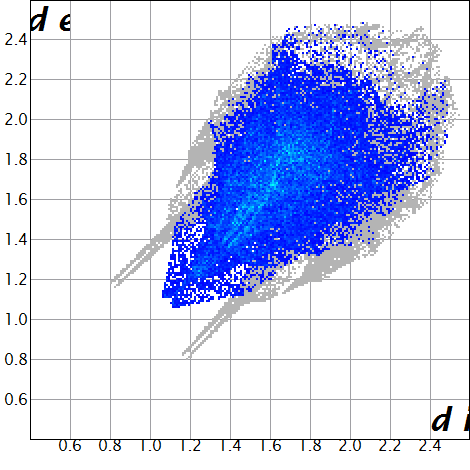**  **H-H (36.9 %)** |
| --- | --- |
| **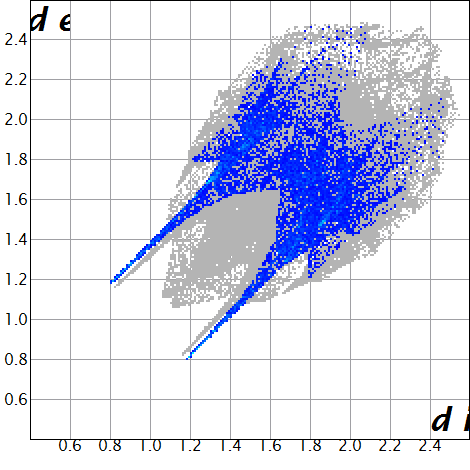**  **H-N (13.6 %)** | **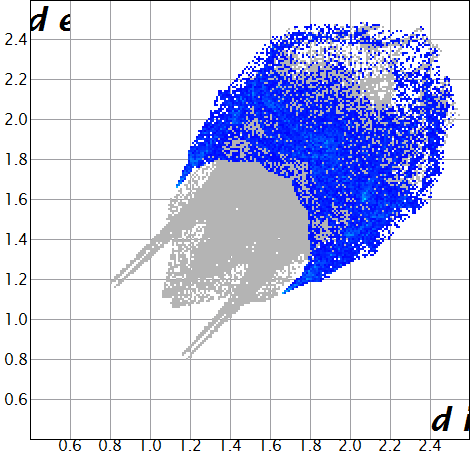**  **H-C (18.6 %)** |
| **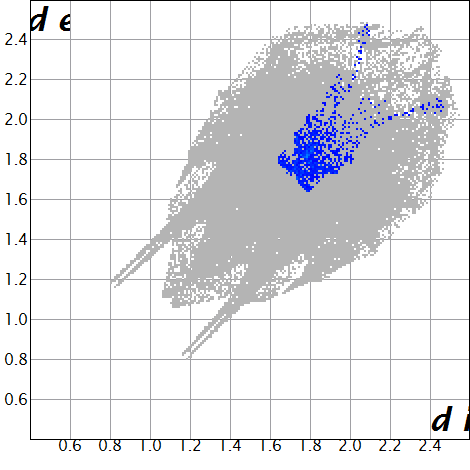**  **O-N (1.5 %)** | **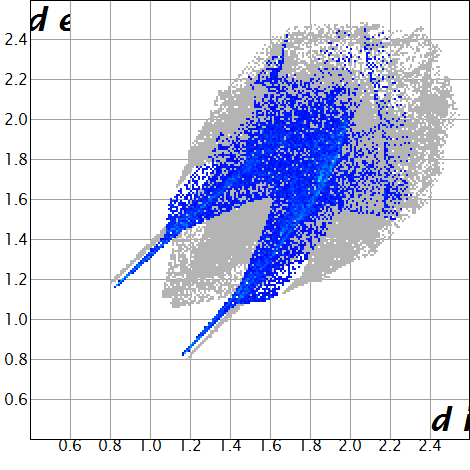**  **H-O (18.5 %)** |
| **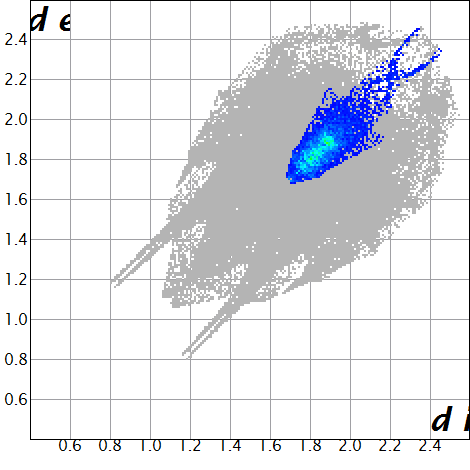**  **C-C (8.3 %)** | **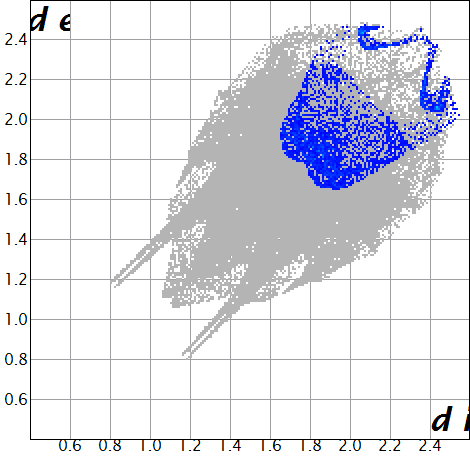**  **C-O (4.2 %)** |

**Fig. S1.** The 2D fingerprint plots along with the percentage of contacts contribution to the total Hirshfeld surface area of Chrom-D.
